# Supplementary material
Source: MDPI journal article supplement (https://www.mdpi.com/2075-163X/13/7/963)
Supplement: s1 [file s1]

Table S1 LA-ICP-MS zircon U-Pb data of the Qingdao granitoids

| Spot No.   | Content (ppm) |      | Th/U | Isotopic ratio                    |            |                                  |            |                                  |            | Age (Ma)                         |            |                                  |            |
|------------|---------------|------|------|-----------------------------------|------------|----------------------------------|------------|----------------------------------|------------|----------------------------------|------------|----------------------------------|------------|
|            | Th            | U    |      | $^{207}\text{Pb}/^{206}\text{Pb}$ | 1 $\sigma$ | $^{207}\text{Pb}/^{235}\text{U}$ | 1 $\sigma$ | $^{206}\text{Pb}/^{238}\text{U}$ | 1 $\sigma$ | $^{207}\text{Pb}/^{235}\text{U}$ | 1 $\sigma$ | $^{206}\text{Pb}/^{238}\text{U}$ | 1 $\sigma$ |
| Granite    |               |      |      |                                   |            |                                  |            |                                  |            |                                  |            |                                  |            |
| QD001-3-01 | 525           | 366  | 1.43 | 0.0499                            | 0.0033     | 0.1337                           | 0.0082     | 0.0192                           | 0.0005     | 127.4                            | 7.4        | 123                              | 2.9        |
| QD001-3-02 | 2640          | 1123 | 2.35 | 0.0474                            | 0.0015     | 0.1219                           | 0.0037     | 0.0186                           | 0.0003     | 116.8                            | 3.4        | 119                              | 2.0        |
| QD001-3-03 | 1212          | 674  | 1.80 | 0.0488                            | 0.0022     | 0.1268                           | 0.0055     | 0.0188                           | 0.0003     | 121.2                            | 4.9        | 120                              | 2.2        |
| QD001-3-05 | 1385          | 650  | 2.13 | 0.0488                            | 0.0021     | 0.1230                           | 0.0053     | 0.0183                           | 0.0003     | 117.8                            | 4.8        | 117                              | 2.2        |
| QD001-3-06 | 2648          | 968  | 2.73 | 0.0531                            | 0.0026     | 0.1463                           | 0.0060     | 0.0203                           | 0.0006     | 138.7                            | 5.3        | 130                              | 4.1        |
| QD001-3-07 | 1405          | 653  | 2.15 | 0.0496                            | 0.0027     | 0.1278                           | 0.0065     | 0.0191                           | 0.0004     | 122.2                            | 5.8        | 122                              | 2.4        |
| QD001-3-08 | 6596          | 2912 | 2.27 | 0.0496                            | 0.0011     | 0.1294                           | 0.0035     | 0.0187                           | 0.0003     | 123.6                            | 3.2        | 120                              | 2.1        |
| QD001-3-09 | 1603          | 756  | 2.12 | 0.0475                            | 0.0016     | 0.1239                           | 0.0049     | 0.0185                           | 0.0003     | 118.6                            | 4.4        | 118                              | 2.1        |
| QD001-3-10 | 1320          | 616  | 2.14 | 0.0491                            | 0.0020     | 0.1246                           | 0.0050     | 0.0186                           | 0.0004     | 119.3                            | 4.5        | 119                              | 2.5        |
| QD001-3-12 | 1399          | 627  | 2.23 | 0.0484                            | 0.0019     | 0.1253                           | 0.0050     | 0.0187                           | 0.0003     | 119.9                            | 4.5        | 120                              | 2.1        |
| QD001-3-13 | 4445          | 1395 | 3.19 | 0.0515                            | 0.0014     | 0.1289                           | 0.0037     | 0.0180                           | 0.0003     | 123.1                            | 3.4        | 115                              | 2.1        |
| QD001-3-14 | 1099          | 605  | 1.82 | 0.0487                            | 0.0020     | 0.1251                           | 0.0051     | 0.0183                           | 0.0004     | 119.7                            | 4.6        | 117                              | 2.3        |
| QD001-3-15 | 2512          | 1039 | 2.42 | 0.0497                            | 0.0017     | 0.1343                           | 0.0045     | 0.0193                           | 0.0004     | 128.0                            | 4.1        | 124                              | 2.4        |
| QD002-2-01 | 1407          | 312  | 4.51 | 0.0473                            | 0.0019     | 0.1189                           | 0.0051     | 0.0187                           | 0.0004     | 114.1                            | 4.6        | 120                              | 2.3        |
| QD002-2-02 | 270           | 153  | 1.76 | 0.0508                            | 0.0026     | 0.1306                           | 0.0069     | 0.0188                           | 0.0003     | 124.7                            | 6.2        | 120                              | 2.1        |
| QD002-2-03 | 159           | 96   | 1.65 | 0.0491                            | 0.0041     | 0.1342                           | 0.0088     | 0.0182                           | 0.0005     | 127.9                            | 7.9        | 116                              | 3.1        |
| QD002-2-04 | 956           | 501  | 1.91 | 0.0509                            | 0.0016     | 0.1322                           | 0.0044     | 0.0190                           | 0.0003     | 126.1                            | 4.0        | 122                              | 2.1        |

|            |     |     |      |        |        |        |        |        |        |       |     |     |     |
|------------|-----|-----|------|--------|--------|--------|--------|--------|--------|-------|-----|-----|-----|
| QD002-2-05 | 816 | 584 | 1.40 | 0.0471 | 0.0014 | 0.1199 | 0.0039 | 0.0185 | 0.0003 | 114.9 | 3.6 | 118 | 1.9 |
| QD002-2-07 | 310 | 190 | 1.63 | 0.0532 | 0.0028 | 0.1402 | 0.0066 | 0.0193 | 0.0004 | 133.3 | 5.8 | 123 | 2.6 |
| QD002-2-08 | 306 | 148 | 2.06 | 0.0522 | 0.0032 | 0.1348 | 0.0076 | 0.0189 | 0.0004 | 128.4 | 6.8 | 121 | 2.6 |
| QD002-2-09 | 802 | 321 | 2.50 | 0.0495 | 0.0033 | 0.1300 | 0.0104 | 0.0192 | 0.0003 | 124.1 | 9.3 | 122 | 2.1 |
| QD002-2-10 | 246 | 138 | 1.78 | 0.0495 | 0.0029 | 0.1217 | 0.0067 | 0.0181 | 0.0004 | 116.6 | 6.0 | 116 | 2.5 |
| QD002-2-11 | 937 | 318 | 2.95 | 0.0493 | 0.0021 | 0.1245 | 0.0058 | 0.0186 | 0.0003 | 119.1 | 5.2 | 119 | 2.1 |
| QD002-2-12 | 222 | 100 | 2.22 | 0.0450 | 0.0032 | 0.1272 | 0.0077 | 0.0191 | 0.0004 | 121.6 | 7.0 | 122 | 2.5 |
| QD002-2-13 | 677 | 387 | 1.75 | 0.0476 | 0.0022 | 0.1254 | 0.0054 | 0.0187 | 0.0004 | 119.9 | 4.9 | 119 | 2.2 |
| QD002-2-14 | 219 | 111 | 1.98 | 0.0520 | 0.0029 | 0.1365 | 0.0064 | 0.0190 | 0.0004 | 129.9 | 5.8 | 121 | 2.5 |
| QD002-2-15 | 563 | 250 | 2.25 | 0.0483 | 0.0021 | 0.1246 | 0.0054 | 0.0188 | 0.0003 | 119.2 | 4.8 | 120 | 2.0 |
| QD003-1-02 | 235 | 199 | 1.18 | 0.0482 | 0.0025 | 0.1243 | 0.0058 | 0.0184 | 0.0003 | 118.9 | 5.2 | 117 | 2.2 |
| QD003-1-03 | 331 | 218 | 1.52 | 0.0544 | 0.0030 | 0.1436 | 0.0064 | 0.0195 | 0.0004 | 136.2 | 5.7 | 125 | 2.5 |
| QD003-1-04 | 746 | 205 | 3.64 | 0.0469 | 0.0021 | 0.1183 | 0.0050 | 0.0184 | 0.0003 | 113.5 | 4.5 | 118 | 2.2 |
| QD003-1-05 | 436 | 270 | 1.61 | 0.0506 | 0.0024 | 0.1311 | 0.0062 | 0.0188 | 0.0003 | 125.1 | 5.6 | 120 | 2.1 |
| QD003-1-06 | 428 | 273 | 1.57 | 0.0490 | 0.0021 | 0.1209 | 0.0051 | 0.0182 | 0.0003 | 115.8 | 4.7 | 116 | 2.1 |
| QD003-1-07 | 381 | 316 | 1.21 | 0.0490 | 0.0020 | 0.1222 | 0.0049 | 0.0184 | 0.0003 | 117.1 | 4.4 | 118 | 2.1 |
| QD003-1-08 | 58  | 33  | 1.75 | 0.0660 | 0.0099 | 0.2441 | 0.0111 | 0.0192 | 0.0007 | 221.8 | 9.1 | 123 | 4.4 |
| QD003-1-09 | 315 | 279 | 1.13 | 0.0466 | 0.0018 | 0.1197 | 0.0048 | 0.0186 | 0.0003 | 114.8 | 4.3 | 119 | 2.0 |
| QD003-1-11 | 300 | 198 | 1.51 | 0.0566 | 0.0030 | 0.1393 | 0.0066 | 0.0184 | 0.0003 | 132.4 | 5.9 | 118 | 2.1 |
| QD003-1-12 | 332 | 285 | 1.16 | 0.0506 | 0.0021 | 0.1320 | 0.0055 | 0.0190 | 0.0003 | 125.9 | 4.9 | 121 | 1.9 |

|            |      |     |      |        |        |        |        |        |        |       |      |     |     |
|------------|------|-----|------|--------|--------|--------|--------|--------|--------|-------|------|-----|-----|
| QD003-1-13 | 335  | 237 | 1.41 | 0.0508 | 0.0026 | 0.1271 | 0.0061 | 0.0187 | 0.0004 | 121.5 | 5.5  | 119 | 2.2 |
| QD005-1-01 | 175  | 105 | 1.66 | 0.0484 | 0.0047 | 0.1376 | 0.0090 | 0.0188 | 0.0005 | 130.9 | 8.0  | 120 | 3.5 |
| QD005-1-03 | 64   | 108 | 0.59 | 0.0514 | 0.0032 | 0.1317 | 0.0074 | 0.0178 | 0.0004 | 125.6 | 6.7  | 114 | 2.3 |
| QD005-1-06 | 325  | 323 | 1.01 | 0.0486 | 0.0019 | 0.1178 | 0.0044 | 0.0178 | 0.0003 | 113.1 | 4.0  | 114 | 1.8 |
| QD005-1-11 | 436  | 198 | 2.21 | 0.0510 | 0.0032 | 0.1167 | 0.0066 | 0.0167 | 0.0003 | 112.0 | 6.0  | 107 | 2.2 |
| QD005-1-12 | 1044 | 491 | 2.12 | 0.0496 | 0.0016 | 0.1249 | 0.0039 | 0.0183 | 0.0003 | 119.5 | 3.6  | 117 | 1.8 |
| QD005-1-13 | 253  | 271 | 0.93 | 0.0553 | 0.0035 | 0.1267 | 0.0077 | 0.0170 | 0.0005 | 121.1 | 7.0  | 109 | 2.9 |
| QD005-1-15 | 322  | 171 | 1.88 | 0.0521 | 0.0024 | 0.1308 | 0.0057 | 0.0181 | 0.0003 | 124.9 | 5.1  | 115 | 2.0 |
| QD009-1-01 | 718  | 269 | 2.67 | 0.1081 | 0.0060 | 0.3125 | 0.0187 | 0.0198 | 0.0004 | 276.2 | 14.4 | 127 | 2.3 |
| QD009-1-02 | 737  | 333 | 2.21 | 0.0498 | 0.0018 | 0.1264 | 0.0046 | 0.0185 | 0.0003 | 120.8 | 4.1  | 118 | 1.9 |
| QD009-1-03 | 211  | 162 | 1.30 | 0.0497 | 0.0024 | 0.1288 | 0.0056 | 0.0191 | 0.0004 | 123.0 | 5.0  | 122 | 2.4 |
| QD009-1-04 | 334  | 226 | 1.48 | 0.0508 | 0.0019 | 0.1353 | 0.0050 | 0.0194 | 0.0003 | 128.9 | 4.4  | 124 | 2.2 |
| QD009-1-05 | 265  | 199 | 1.33 | 0.0512 | 0.0022 | 0.1294 | 0.0055 | 0.0186 | 0.0003 | 123.6 | 4.9  | 119 | 1.9 |
| QD009-1-06 | 247  | 176 | 1.40 | 0.0515 | 0.0025 | 0.1364 | 0.0062 | 0.0193 | 0.0004 | 129.8 | 5.5  | 123 | 2.2 |
| QD009-1-07 | 244  | 179 | 1.36 | 0.0504 | 0.0022 | 0.1290 | 0.0053 | 0.0188 | 0.0003 | 123.2 | 4.8  | 120 | 2.0 |
| QD009-1-08 | 361  | 226 | 1.60 | 0.0478 | 0.0020 | 0.1226 | 0.0049 | 0.0187 | 0.0003 | 117.4 | 4.4  | 119 | 2.0 |
| QD009-1-09 | 127  | 127 | 0.99 | 0.0471 | 0.0027 | 0.1229 | 0.0068 | 0.0183 | 0.0003 | 117.7 | 6.2  | 117 | 2.2 |
| QD009-1-10 | 302  | 205 | 1.48 | 0.0564 | 0.0022 | 0.1372 | 0.0051 | 0.0179 | 0.0003 | 130.6 | 4.6  | 115 | 2.1 |
| QD009-1-11 | 173  | 163 | 1.06 | 0.0496 | 0.0024 | 0.1237 | 0.0056 | 0.0179 | 0.0003 | 118.4 | 5.1  | 115 | 2.1 |
| QD009-1-13 | 310  | 183 | 1.69 | 0.0507 | 0.0021 | 0.1282 | 0.0045 | 0.0190 | 0.0003 | 122.5 | 4.1  | 122 | 2.1 |

|            |      |      |      |        |        |        |        |        |        |       |     |     |     |
|------------|------|------|------|--------|--------|--------|--------|--------|--------|-------|-----|-----|-----|
| QD009-1-14 | 426  | 256  | 1.67 | 0.0476 | 0.0018 | 0.1173 | 0.0044 | 0.0181 | 0.0003 | 112.6 | 4.0 | 116 | 1.8 |
| QD009-1-15 | 320  | 221  | 1.45 | 0.0487 | 0.0021 | 0.1225 | 0.0050 | 0.0182 | 0.0003 | 117.3 | 4.6 | 116 | 2.0 |
| QD009-1-16 | 118  | 122  | 0.97 | 0.0476 | 0.0028 | 0.1304 | 0.0065 | 0.0193 | 0.0004 | 124.4 | 5.9 | 123 | 2.4 |
| QD009-1-17 | 345  | 228  | 1.51 | 0.0524 | 0.0023 | 0.1287 | 0.0054 | 0.0182 | 0.0003 | 123.0 | 4.8 | 116 | 1.8 |
| QD009-1-18 | 262  | 216  | 1.21 | 0.0485 | 0.0020 | 0.1200 | 0.0047 | 0.0182 | 0.0003 | 115.1 | 4.3 | 117 | 1.8 |
| QD009-1-19 | 208  | 193  | 1.07 | 0.0486 | 0.0026 | 0.1182 | 0.0060 | 0.0178 | 0.0003 | 113.5 | 5.4 | 114 | 2.1 |
| QD009-1-20 | 260  | 208  | 1.25 | 0.0460 | 0.0021 | 0.1130 | 0.0052 | 0.0180 | 0.0003 | 108.7 | 4.7 | 115 | 1.8 |
| QD012-1-01 | 123  | 69   | 1.80 | 0.0512 | 0.0040 | 0.1481 | 0.0087 | 0.0184 | 0.0005 | 140.2 | 7.7 | 118 | 3.4 |
| QD012-1-02 | 241  | 144  | 1.67 | 0.0478 | 0.0026 | 0.1224 | 0.0061 | 0.0182 | 0.0003 | 117.2 | 5.5 | 116 | 2.2 |
| QD012-1-04 | 766  | 359  | 2.13 | 0.0484 | 0.0016 | 0.1225 | 0.0045 | 0.0184 | 0.0004 | 117.4 | 4.1 | 118 | 2.4 |
| QD012-1-05 | 154  | 129  | 1.20 | 0.0470 | 0.0028 | 0.1320 | 0.0071 | 0.0198 | 0.0004 | 125.9 | 6.4 | 126 | 2.7 |
| QD012-1-06 | 105  | 75   | 1.40 | 0.0451 | 0.0039 | 0.1377 | 0.0076 | 0.0180 | 0.0005 | 131.0 | 6.8 | 115 | 3.2 |
| QD012-1-07 | 132  | 67   | 1.96 | 0.0485 | 0.0038 | 0.1449 | 0.0071 | 0.0189 | 0.0005 | 137.4 | 6.3 | 121 | 3.1 |
| QD012-1-08 | 136  | 115  | 1.18 | 0.0482 | 0.0038 | 0.1188 | 0.0077 | 0.0175 | 0.0005 | 114.0 | 7.0 | 112 | 3.1 |
| QD012-1-09 | 4294 | 1153 | 3.72 | 0.0570 | 0.0011 | 0.1431 | 0.0029 | 0.0181 | 0.0002 | 135.8 | 2.6 | 116 | 1.4 |
| QD012-1-11 | 455  | 170  | 2.67 | 0.0490 | 0.0030 | 0.1231 | 0.0074 | 0.0184 | 0.0005 | 117.9 | 6.7 | 118 | 2.9 |
| QD012-1-12 | 1285 | 527  | 2.44 | 0.0492 | 0.0016 | 0.1289 | 0.0042 | 0.0191 | 0.0003 | 123.1 | 3.8 | 122 | 2.0 |
| QD012-1-13 | 288  | 164  | 1.75 | 0.0528 | 0.0028 | 0.1363 | 0.0067 | 0.0186 | 0.0003 | 129.7 | 6.0 | 119 | 2.1 |
| QD012-1-14 | 423  | 233  | 1.82 | 0.0490 | 0.0021 | 0.1267 | 0.0054 | 0.0188 | 0.0003 | 121.1 | 4.9 | 120 | 2.2 |
| QD015-1-01 | 1921 | 831  | 2.31 | 0.0482 | 0.0012 | 0.1248 | 0.0034 | 0.0187 | 0.0003 | 119.4 | 3.1 | 119 | 1.8 |

|            |      |     |      |        |        |        |        |        |        |       |     |     |     |
|------------|------|-----|------|--------|--------|--------|--------|--------|--------|-------|-----|-----|-----|
| QD015-1-02 | 956  | 552 | 1.73 | 0.0509 | 0.0019 | 0.1240 | 0.0047 | 0.0176 | 0.0003 | 118.7 | 4.2 | 113 | 2.0 |
| QD015-1-03 | 1467 | 825 | 1.78 | 0.0526 | 0.0017 | 0.1310 | 0.0044 | 0.0180 | 0.0003 | 125.0 | 4.0 | 115 | 2.2 |
| QD015-1-04 | 1288 | 580 | 2.22 | 0.0490 | 0.0014 | 0.1263 | 0.0038 | 0.0187 | 0.0003 | 120.8 | 3.4 | 119 | 1.8 |
| QD015-1-05 | 1419 | 794 | 1.79 | 0.0493 | 0.0012 | 0.1267 | 0.0033 | 0.0187 | 0.0003 | 121.2 | 2.9 | 119 | 1.8 |
| QD015-1-06 | 714  | 296 | 2.42 | 0.0566 | 0.0027 | 0.1446 | 0.0076 | 0.0183 | 0.0003 | 137.1 | 6.8 | 117 | 2.0 |
| QD015-1-07 | 528  | 149 | 3.55 | 0.0467 | 0.0030 | 0.1233 | 0.0071 | 0.0187 | 0.0004 | 118.1 | 6.4 | 120 | 2.6 |
| QD015-1-08 | 1911 | 845 | 2.26 | 0.0488 | 0.0013 | 0.1239 | 0.0038 | 0.0183 | 0.0003 | 118.6 | 3.4 | 117 | 1.6 |
| QD015-1-09 | 775  | 415 | 1.87 | 0.0511 | 0.0020 | 0.1384 | 0.0054 | 0.0197 | 0.0004 | 131.6 | 4.8 | 126 | 2.3 |
| QD015-1-11 | 2440 | 981 | 2.49 | 0.0507 | 0.0013 | 0.1291 | 0.0034 | 0.0185 | 0.0003 | 123.3 | 3.1 | 118 | 1.8 |
| QD015-1-12 | 736  | 467 | 1.58 | 0.0484 | 0.0014 | 0.1222 | 0.0041 | 0.0181 | 0.0003 | 117.1 | 3.7 | 116 | 1.8 |
| QD015-1-13 | 211  | 97  | 2.18 | 0.0529 | 0.0055 | 0.1347 | 0.0105 | 0.0183 | 0.0006 | 128.3 | 9.4 | 117 | 3.6 |
| QD015-1-14 | 264  | 111 | 2.37 | 0.0515 | 0.0031 | 0.1370 | 0.0073 | 0.0187 | 0.0004 | 130.3 | 6.6 | 120 | 2.6 |
| QD015-1-15 | 2055 | 924 | 2.22 | 0.0442 | 0.0011 | 0.1121 | 0.0030 | 0.0184 | 0.0003 | 107.9 | 2.7 | 117 | 1.8 |
| QD016-1-01 | 866  | 187 | 4.64 | 0.0447 | 0.0021 | 0.1184 | 0.0055 | 0.0190 | 0.0003 | 113.7 | 5.0 | 121 | 2.1 |
| QD016-1-02 | 411  | 142 | 2.90 | 0.0511 | 0.0033 | 0.1287 | 0.0070 | 0.0185 | 0.0004 | 123.0 | 6.3 | 118 | 2.4 |
| QD016-1-03 | 448  | 157 | 2.86 | 0.0491 | 0.0027 | 0.1235 | 0.0062 | 0.0185 | 0.0004 | 118.2 | 5.6 | 118 | 2.2 |
| QD016-1-04 | 2025 | 550 | 3.68 | 0.0480 | 0.0015 | 0.1216 | 0.0039 | 0.0184 | 0.0003 | 116.5 | 3.5 | 117 | 1.8 |
| QD016-1-06 | 1723 | 564 | 3.06 | 0.0484 | 0.0017 | 0.1213 | 0.0041 | 0.0182 | 0.0003 | 116.2 | 3.7 | 117 | 1.7 |
| QD016-1-07 | 366  | 123 | 2.97 | 0.0494 | 0.0035 | 0.1297 | 0.0079 | 0.0184 | 0.0004 | 123.8 | 7.1 | 118 | 2.7 |
| QD016-1-09 | 142  | 73  | 1.96 | 0.0488 | 0.0042 | 0.1484 | 0.0088 | 0.0196 | 0.0006 | 140.5 | 7.8 | 125 | 3.5 |

|                  |     |     |      |        |        |        |        |        |        |       |     |     |     |
|------------------|-----|-----|------|--------|--------|--------|--------|--------|--------|-------|-----|-----|-----|
| QD016-1-10       | 209 | 102 | 2.05 | 0.0529 | 0.0030 | 0.1489 | 0.0071 | 0.0188 | 0.0004 | 141.0 | 6.3 | 120 | 2.8 |
| QD016-1-11       | 268 | 130 | 2.07 | 0.0454 | 0.0034 | 0.1215 | 0.0074 | 0.0179 | 0.0005 | 116.4 | 6.7 | 115 | 3.0 |
| QD016-1-12       | 601 | 232 | 2.60 | 0.0484 | 0.0022 | 0.1244 | 0.0053 | 0.0187 | 0.0003 | 119.1 | 4.8 | 120 | 2.1 |
| QD016-1-13       | 289 | 128 | 2.25 | 0.0502 | 0.0032 | 0.1354 | 0.0076 | 0.0195 | 0.0004 | 128.9 | 6.8 | 124 | 2.8 |
| QD016-1-14       | 531 | 187 | 2.83 | 0.0486 | 0.0022 | 0.1325 | 0.0062 | 0.0197 | 0.0004 | 126.3 | 5.6 | 126 | 2.5 |
| QD016-1-15       | 324 | 136 | 2.38 | 0.0516 | 0.0028 | 0.1351 | 0.0064 | 0.0192 | 0.0004 | 128.7 | 5.8 | 123 | 2.7 |
| Quartz monzonite |     |     |      |        |        |        |        |        |        |       |     |     |     |
| QD008-1-01       | 612 | 321 | 1.90 | 0.0510 | 0.0029 | 0.1372 | 0.0068 | 0.0197 | 0.0005 | 130.6 | 6.1 | 126 | 3.0 |
| QD008-1-02       | 252 | 213 | 1.18 | 0.0498 | 0.0022 | 0.1316 | 0.0054 | 0.0188 | 0.0003 | 125.5 | 4.8 | 120 | 2.2 |
| QD008-1-03       | 398 | 281 | 1.42 | 0.0478 | 0.0021 | 0.1220 | 0.0057 | 0.0185 | 0.0003 | 116.9 | 5.1 | 118 | 1.9 |
| QD008-1-04       | 299 | 203 | 1.47 | 0.0484 | 0.0022 | 0.1250 | 0.0060 | 0.0188 | 0.0003 | 119.6 | 5.5 | 120 | 2.2 |
| QD008-1-05       | 273 | 229 | 1.20 | 0.0492 | 0.0025 | 0.1238 | 0.0057 | 0.0187 | 0.0003 | 118.5 | 5.1 | 119 | 2.1 |
| QD008-1-06       | 650 | 270 | 2.40 | 0.0509 | 0.0022 | 0.1321 | 0.0055 | 0.0190 | 0.0003 | 126.0 | 5.0 | 122 | 2.0 |
| QD008-1-07       | 418 | 318 | 1.32 | 0.0518 | 0.0021 | 0.1321 | 0.0053 | 0.0187 | 0.0003 | 126.0 | 4.8 | 119 | 2.0 |
| QD008-1-08       | 298 | 228 | 1.30 | 0.0504 | 0.0024 | 0.1308 | 0.0061 | 0.0192 | 0.0004 | 124.8 | 5.4 | 123 | 2.3 |
| QD008-1-09       | 211 | 195 | 1.08 | 0.0495 | 0.0021 | 0.1294 | 0.0054 | 0.0188 | 0.0003 | 123.6 | 4.9 | 120 | 2.0 |
| QD008-1-10       | 167 | 132 | 1.26 | 0.0501 | 0.0029 | 0.1429 | 0.0075 | 0.0194 | 0.0004 | 135.6 | 6.7 | 124 | 2.6 |
| QD008-1-12       | 284 | 246 | 1.16 | 0.0499 | 0.0020 | 0.1228 | 0.0047 | 0.0183 | 0.0003 | 117.6 | 4.2 | 117 | 2.1 |
| QD008-1-14       | 482 | 340 | 1.42 | 0.0500 | 0.0020 | 0.1286 | 0.0049 | 0.0188 | 0.0003 | 122.8 | 4.4 | 120 | 1.9 |
| QD008-1-15       | 468 | 335 | 1.40 | 0.0491 | 0.0017 | 0.1277 | 0.0041 | 0.0191 | 0.0003 | 122.0 | 3.7 | 122 | 2.1 |

Table S2 Zircon Hf isotopic data of the Qingdao granitoids

| Sample No. | Age(Ma) | $^{176}\text{Yb}/^{177}\text{Hf}$ | $^{176}\text{Lu}/^{177}\text{Hf}$ | $^{176}\text{Hf}/^{177}\text{Hf}$ | $2\sigma$ | $\varepsilon_{\text{Hf}}(t)$ | $2\sigma$ | $T_{\text{DM1}}$ | $T_{\text{DM}}(\text{Hf2})^{\text{C}}$ | $f_{\text{Lu/Hf}}$ |
|------------|---------|-----------------------------------|-----------------------------------|-----------------------------------|-----------|------------------------------|-----------|------------------|----------------------------------------|--------------------|
| QD002-2-04 | 120.2   | 0.064018                          | 0.002146                          | 0.282211                          | 0.000031  | -17.38                       | 1.10      | 1513             | 2273                                   | -0.94              |
| QD002-2-05 | 120.2   | 0.065337                          | 0.002052                          | 0.282138                          | 0.000036  | -19.96                       | 1.27      | 1614             | 2435                                   | -0.94              |
| QD002-2-09 | 120.2   | 0.059463                          | 0.002076                          | 0.282185                          | 0.000033  | -18.31                       | 1.15      | 1548             | 2332                                   | -0.94              |
| QD002-2-10 | 120.2   | 0.040519                          | 0.001403                          | 0.282129                          | 0.000030  | -20.23                       | 1.04      | 1599             | 2452                                   | -0.96              |
| QD002-2-11 | 120.2   | 0.044078                          | 0.001548                          | 0.282083                          | 0.000028  | -21.87                       | 1.00      | 1670             | 2555                                   | -0.95              |
| QD002-2-15 | 120.2   | 0.048737                          | 0.001798                          | 0.282081                          | 0.000024  | -21.97                       | 0.85      | 1685             | 2561                                   | -0.95              |
| QD003-1-02 | 118.6   | 0.032555                          | 0.001162                          | 0.282220                          | 0.000024  | -17.00                       | 0.86      | 1461             | 2250                                   | -0.96              |
| QD003-1-05 | 118.6   | 0.066911                          | 0.002138                          | 0.282376                          | 0.000031  | -11.56                       | 1.10      | 1276             | 1907                                   | -0.94              |
| QD003-1-06 | 118.6   | 0.072881                          | 0.002551                          | 0.282281                          | 0.000030  | -14.97                       | 1.06      | 1429             | 2121                                   | -0.92              |
| QD003-1-07 | 118.6   | 0.042425                          | 0.001453                          | 0.282214                          | 0.000024  | -17.25                       | 0.85      | 1482             | 2265                                   | -0.96              |
| QD003-1-09 | 118.6   | 0.032014                          | 0.001141                          | 0.282136                          | 0.000022  | -19.98                       | 0.79      | 1578             | 2437                                   | -0.97              |
| QD003-1-13 | 118.6   | 0.060592                          | 0.001787                          | 0.282169                          | 0.000026  | -18.84                       | 0.93      | 1558             | 2365                                   | -0.95              |
| QD005-1-01 | 113.1   | 0.048169                          | 0.001512                          | 0.282289                          | 0.000029  | -14.73                       | 1.03      | 1378             | 2102                                   | -0.95              |
| QD005-1-03 | 113.1   | 0.056908                          | 0.001751                          | 0.282333                          | 0.000035  | -13.17                       | 1.24      | 1323             | 2004                                   | -0.95              |
| QD005-1-06 | 113.1   | 0.059561                          | 0.001960                          | 0.282297                          | 0.000023  | -14.47                       | 0.82      | 1383             | 2086                                   | -0.94              |
| QD005-1-11 | 113.1   | 0.039731                          | 0.001319                          | 0.282307                          | 0.000029  | -14.05                       | 1.03      | 1345             | 2060                                   | -0.96              |
| QD005-1-12 | 113.1   | 0.115414                          | 0.003448                          | 0.282690                          | 0.000040  | -0.68                        | 1.40      | 852              | 1213                                   | -0.90              |
| QD005-1-15 | 113.1   | 0.060392                          | 0.002016                          | 0.282177                          | 0.000026  | -18.73                       | 0.93      | 1557             | 2353                                   | -0.94              |
| QD009-1-03 | 117.0   | 0.064625                          | 0.002098                          | 0.282359                          | 0.000030  | -12.19                       | 1.06      | 1299             | 1945                                   | -0.94              |

|            |       |          |          |          |          |        |      |      |      |       |
|------------|-------|----------|----------|----------|----------|--------|------|------|------|-------|
| QD009-1-07 | 117.0 | 0.050146 | 0.001558 | 0.282342 | 0.000025 | -12.75 | 0.88 | 1305 | 1981 | -0.95 |
| QD009-1-08 | 117.0 | 0.058094 | 0.001974 | 0.282266 | 0.000024 | -15.47 | 0.85 | 1428 | 2152 | -0.94 |
| QD009-1-11 | 117.0 | 0.047657 | 0.001536 | 0.282256 | 0.000023 | -15.78 | 0.81 | 1425 | 2172 | -0.95 |
| QD009-1-13 | 117.0 | 0.042870 | 0.001386 | 0.282255 | 0.000025 | -15.80 | 0.90 | 1421 | 2173 | -0.96 |
| QD009-1-15 | 117.0 | 0.019815 | 0.000771 | 0.282137 | 0.000022 | -19.94 | 0.79 | 1562 | 2433 | -0.98 |
| QD012-1-02 | 117.4 | 0.035823 | 0.001129 | 0.282055 | 0.000031 | -22.87 | 1.08 | 1691 | 2617 | -0.97 |
| QD012-1-04 | 117.4 | 0.038810 | 0.001405 | 0.282042 | 0.000030 | -23.35 | 1.06 | 1722 | 2647 | -0.96 |
| QD012-1-05 | 117.4 | 0.025489 | 0.000904 | 0.281992 | 0.000030 | -25.08 | 1.06 | 1768 | 2755 | -0.97 |
| QD012-1-11 | 117.4 | 0.068861 | 0.002020 | 0.282166 | 0.000035 | -19.02 | 1.26 | 1573 | 2375 | -0.94 |
| QD012-1-12 | 117.4 | 0.090152 | 0.003082 | 0.282332 | 0.000035 | -13.21 | 1.23 | 1374 | 2009 | -0.91 |
| QD012-1-14 | 117.4 | 0.063717 | 0.002007 | 0.282191 | 0.000035 | -18.11 | 1.25 | 1536 | 2318 | -0.94 |
| QD015-1-01 | 117.7 | 0.086274 | 0.002535 | 0.282404 | 0.000038 | -10.64 | 1.33 | 1249 | 1847 | -0.92 |
| QD015-1-02 | 117.7 | 0.129245 | 0.004152 | 0.282595 | 0.000040 | -3.99  | 1.42 | 1015 | 1427 | -0.87 |
| QD015-1-04 | 117.7 | 0.081229 | 0.002505 | 0.282384 | 0.000036 | -11.35 | 1.29 | 1277 | 1892 | -0.92 |
| QD015-1-05 | 117.7 | 0.114535 | 0.003635 | 0.282474 | 0.000039 | -8.24  | 1.38 | 1183 | 1695 | -0.89 |
| QD015-1-07 | 117.7 | 0.047020 | 0.001455 | 0.282236 | 0.000033 | -16.47 | 1.15 | 1450 | 2216 | -0.96 |
| QD016-1-02 | 119.4 | 0.079076 | 0.002208 | 0.282326 | 0.000029 | -13.31 | 1.03 | 1350 | 2017 | -0.93 |
| QD016-1-03 | 119.4 | 0.049828 | 0.001460 | 0.282139 | 0.000025 | -19.87 | 0.87 | 1587 | 2430 | -0.96 |
| QD016-1-04 | 119.4 | 0.095334 | 0.002912 | 0.282168 | 0.000031 | -18.95 | 1.08 | 1608 | 2371 | -0.91 |
| QD016-1-08 | 119.4 | 0.029125 | 0.001026 | 0.282058 | 0.000024 | -22.70 | 0.87 | 1682 | 2608 | -0.97 |



|            |       |          |          |          |          |        |      |      |      |       |
|------------|-------|----------|----------|----------|----------|--------|------|------|------|-------|
| QD016-1-13 | 119.4 | 0.074164 | 0.002285 | 0.282258 | 0.000030 | -15.73 | 1.04 | 1452 | 2170 | -0.93 |
| QD016-1-14 | 119.4 | 0.034764 | 0.001164 | 0.282058 | 0.000020 | -22.70 | 0.71 | 1687 | 2607 | -0.96 |
| QD008-1-01 | 120.5 | 0.026203 | 0.000815 | 0.282048 | 0.000019 | -23.07 | 0.67 | 1686 | 2630 | -0.98 |
| QD008-1-02 | 120.5 | 0.023806 | 0.000782 | 0.282055 | 0.000025 | -22.82 | 0.90 | 1674 | 2614 | -0.98 |
| QD008-1-03 | 120.5 | 0.026406 | 0.000916 | 0.282001 | 0.000019 | -24.77 | 0.68 | 1756 | 2736 | -0.97 |
| QD008-1-04 | 120.5 | 0.033448 | 0.001088 | 0.282014 | 0.000029 | -24.32 | 1.03 | 1746 | 2708 | -0.97 |
| QD008-1-05 | 120.5 | 0.019110 | 0.000632 | 0.282055 | 0.000020 | -22.83 | 0.72 | 1669 | 2615 | -0.98 |
| QD008-1-07 | 120.5 | 0.023551 | 0.000891 | 0.282018 | 0.000027 | -24.15 | 0.94 | 1731 | 2697 | -0.97 |
| QD008-1-08 | 120.5 | 0.018063 | 0.000683 | 0.281937 | 0.000022 | -27.01 | 0.79 | 1833 | 2876 | -0.98 |

Table S3 Whole-rock major and trace elements and Sr-Nd isotopes of the Qingdao granitoids

| Sample No.                         | QD001-3 | QD001-4 | QD002-3 | QD002-4 | QD002-5 | QD003-1 | QD003-5 | QD004-3 | QD005-1 | QD005-3 | QD006-1 |
|------------------------------------|---------|---------|---------|---------|---------|---------|---------|---------|---------|---------|---------|
| SiO <sub>2</sub>                   | 74.83   | 76.61   | 73.01   | 76.29   | 76.49   | 75.83   | 75.6    | 76.48   | 77.3    | 76.99   | 77.71   |
| Al <sub>2</sub> O <sub>3</sub>     | 13.64   | 12.23   | 13.98   | 13.01   | 13.06   | 12.69   | 13.72   | 12.4    | 12.58   | 12.73   | 12.36   |
| Fe <sub>2</sub> O <sub>3</sub>     | 0.8     | 1.09    | 1.2     | 0.72    | 0.68    | 0.91    | 0.71    | 0.84    | 0.23    | 0.76    | 0.12    |
| FeO                                | 0.11    | 0.12    | 0.43    | 0.081   | 0.12    | 0.29    | 0.17    | 0.2     | 0.34    | 0.089   | 0.55    |
| CaO                                | 0.39    | 0.38    | 1.06    | 0.33    | 0.33    | 0.45    | 0.36    | 0.38    | 0.26    | 0.1     | 0.072   |
| MgO                                | 0.075   | 0.15    | 0.36    | 0.065   | 0.063   | 0.17    | 0.055   | 0.16    | 0.041   | 0.042   | 0.04    |
| K <sub>2</sub> O                   | 5.3     | 4.67    | 4.65    | 4.73    | 4.62    | 4.79    | 4.69    | 4.8     | 4.4     | 4.54    | 4.45    |
| Na <sub>2</sub> O                  | 4.28    | 4.09    | 4.46    | 4.31    | 4.16    | 4.26    | 4.06    | 4.08    | 4.31    | 4.38    | 4.21    |
| TiO <sub>2</sub>                   | 0.16    | 0.23    | 0.28    | 0.13    | 0.12    | 0.22    | 0.15    | 0.19    | 0.087   | 0.1     | 0.092   |
| P <sub>2</sub> O <sub>5</sub>      | 0.017   | 0.026   | 0.067   | 0.006   | 0.01    | 0.03    | 0.014   | 0.024   | 0.007   | 0.008   | 0.01    |
| MnO                                | 0.047   | 0.062   | 0.058   | 0.047   | 0.063   | 0.072   | 0.044   | 0.036   | 0.014   | 0.008   | 0.008   |
| LOI                                | 0.34    | 0.32    | 0.4     | 0.26    | 0.27    | 0.26    | 0.41    | 0.4     | 0.4     | 0.24    | 0.32    |
| K <sub>2</sub> O/Na <sub>2</sub> O | 1.24    | 1.14    | 1.04    | 1.10    | 1.11    | 1.12    | 1.16    | 1.18    | 1.02    | 1.04    | 1.06    |
| K <sub>2</sub> O+Na <sub>2</sub> O | 9.58    | 8.76    | 9.11    | 9.04    | 8.78    | 9.05    | 8.75    | 8.88    | 8.71    | 8.92    | 8.66    |
| Mg#                                | 0.16    | 0.21    | 0.37    | 0.15    | 0.16    | 0.27    | 0.13    | 0.27    | 0.26    | 0.10    | 0.40    |
| Li                                 | 3.23    | 12.60   | 22.55   | 2.96    | 4.00    | 12.65   | 3.64    | 7.06    | 7.58    | 4.00    | 2.44    |
| Be                                 | 4.29    | 5.02    | 3.89    | 3.20    | 3.45    | 4.72    | 4.22    | 4.81    | 4.76    | 6.51    | 5.93    |
| Sc                                 | 4.34    | 2.97    | 4.88    | 3.56    | 3.70    | 3.89    | 3.92    | 3.47    | 2.35    | 2.47    | 2.43    |
| Ti                                 | 941.98  | 1435.97 | 1567.76 | 706.50  | 730.20  | 1347.57 | 940.00  | 1072.51 | 545.59  | 591.61  | 584.09  |

|    |        |        |        |        |        |        |        |        |        |        |        |
|----|--------|--------|--------|--------|--------|--------|--------|--------|--------|--------|--------|
| V  | 2.76   | 7.09   | 15.24  | 1.77   | 1.82   | 7.15   | 2.75   | 5.92   | 1.01   | 1.38   | 1.28   |
| Cr | 1.41   | 1.85   | 3.86   | 1.57   | 1.31   | 1.37   | 1.59   | 1.31   | 1.20   | 2.03   | 1.44   |
| Mn | 312.60 | 466.44 | 414.47 | 340.09 | 383.31 | 505.71 | 340.08 | 255.85 | 70.38  | 27.25  | 22.22  |
| Co | 0.16   | 0.55   | 1.60   | 0.26   | 0.24   | 0.57   | 0.18   | 0.58   | 0.04   | 0.11   | 0.11   |
| Ni | 0.39   | 0.46   | 1.54   | 0.67   | 0.57   | 0.32   | 0.37   | 0.50   | 0.16   | 0.78   | 0.26   |
| Cu | 0.88   | 0.78   | 0.94   | 1.24   | 0.64   | 0.68   | 0.99   | 0.65   | 1.04   | 1.82   | 3.73   |
| Zn | 24.01  | 35.83  | 25.94  | 21.27  | 20.64  | 38.80  | 26.48  | 28.89  | 22.08  | 14.23  | 15.81  |
| Ga | 16.85  | 18.48  | 16.06  | 16.82  | 17.17  | 18.41  | 16.88  | 18.63  | 21.32  | 20.94  | 20.35  |
| Rb | 165.08 | 170.69 | 145.70 | 149.08 | 155.53 | 171.29 | 156.77 | 181.62 | 295.51 | 264.43 | 251.57 |
| Sr | 16.12  | 28.03  | 157.26 | 8.23   | 8.68   | 38.62  | 16.36  | 40.55  | 8.46   | 9.75   | 8.19   |
| Y  | 18.59  | 33.98  | 18.31  | 13.24  | 14.30  | 31.93  | 19.11  | 20.79  | 45.14  | 21.82  | 28.67  |
| Zr | 188.07 | 207.30 | 226.58 | 145.29 | 143.01 | 227.74 | 188.77 | 157.37 | 187.33 | 184.59 | 206.20 |
| Nb | 25.93  | 33.72  | 23.93  | 25.69  | 26.47  | 30.99  | 26.03  | 25.12  | 95.60  | 77.70  | 74.07  |
| Cs | 0.74   | 1.08   | 1.21   | 0.58   | 0.62   | 1.17   | 0.71   | 0.90   | 2.01   | 1.20   | 0.75   |
| Ba | 48.74  | 164.20 | 561.01 | 25.05  | 27.14  | 211.17 | 55.80  | 221.46 | 36.04  | 45.47  | 41.37  |
| La | 46.71  | 36.08  | 45.45  | 24.86  | 28.20  | 30.89  | 50.03  | 46.42  | 44.79  | 19.23  | 29.30  |
| Ce | 74.30  | 81.52  | 84.56  | 54.70  | 65.19  | 73.05  | 80.46  | 79.40  | 84.40  | 45.65  | 58.81  |
| Pr | 7.21   | 9.02   | 8.47   | 3.87   | 4.44   | 8.37   | 7.64   | 7.46   | 9.87   | 5.69   | 6.22   |
| Nd | 19.79  | 28.60  | 25.24  | 10.18  | 11.41  | 27.25  | 20.83  | 21.67  | 30.82  | 17.58  | 18.65  |
| Sm | 3.09   | 5.56   | 4.08   | 1.67   | 1.87   | 5.41   | 3.26   | 3.78   | 6.78   | 4.22   | 3.92   |

|                                    |        |        |        |        |        |        |        |        |        |        |        |
|------------------------------------|--------|--------|--------|--------|--------|--------|--------|--------|--------|--------|--------|
| Eu                                 | 0.30   | 0.42   | 0.67   | 0.13   | 0.14   | 0.46   | 0.30   | 0.38   | 0.12   | 0.13   | 0.09   |
| Gd                                 | 2.21   | 4.45   | 2.93   | 1.12   | 1.28   | 4.26   | 2.25   | 2.83   | 4.96   | 3.23   | 3.06   |
| Tb                                 | 0.41   | 0.82   | 0.48   | 0.24   | 0.28   | 0.79   | 0.42   | 0.52   | 0.92   | 0.66   | 0.63   |
| Dy                                 | 2.59   | 5.25   | 2.84   | 1.70   | 1.85   | 5.01   | 2.66   | 3.23   | 5.62   | 4.10   | 4.07   |
| Ho                                 | 0.58   | 1.14   | 0.60   | 0.41   | 0.44   | 1.08   | 0.60   | 0.70   | 1.18   | 0.84   | 0.87   |
| Er                                 | 1.91   | 3.58   | 1.88   | 1.42   | 1.51   | 3.33   | 1.95   | 2.16   | 3.71   | 2.55   | 2.73   |
| Tm                                 | 0.32   | 0.57   | 0.29   | 0.25   | 0.27   | 0.54   | 0.33   | 0.35   | 0.62   | 0.41   | 0.44   |
| Yb                                 | 2.26   | 3.82   | 2.16   | 1.88   | 2.05   | 3.74   | 2.36   | 2.49   | 4.46   | 2.90   | 3.18   |
| Lu                                 | 0.36   | 0.55   | 0.33   | 0.30   | 0.32   | 0.55   | 0.37   | 0.38   | 0.66   | 0.43   | 0.48   |
| Hf                                 | 6.43   | 7.05   | 6.44   | 5.69   | 5.67   | 7.36   | 6.55   | 5.21   | 7.90   | 8.29   | 9.06   |
| Ta                                 | 1.63   | 2.25   | 1.50   | 1.64   | 1.70   | 1.94   | 1.65   | 1.49   | 5.16   | 6.22   | 5.62   |
| Pb                                 | 28.28  | 18.22  | 19.34  | 22.66  | 23.91  | 21.74  | 28.10  | 20.79  | 21.95  | 22.23  | 12.61  |
| Th                                 | 19.61  | 16.70  | 14.12  | 20.42  | 20.94  | 14.78  | 20.12  | 16.18  | 29.02  | 21.71  | 23.48  |
| U                                  | 3.27   | 1.90   | 1.59   | 2.48   | 2.52   | 2.15   | 3.30   | 2.82   | 16.78  | 5.76   | 8.65   |
| $\Sigma_{\text{REE}}$              | 162.03 | 181.38 | 179.99 | 102.71 | 119.25 | 164.74 | 173.46 | 171.75 | 198.90 | 107.63 | 132.45 |
| $L_{\text{REE}}/H_{\text{REE}}$    | 14.25  | 7.99   | 14.63  | 13.04  | 13.91  | 7.53   | 14.86  | 12.58  | 7.99   | 6.12   | 7.57   |
| $(\text{La}/\text{Yb})_{\text{N}}$ | 14.82  | 6.78   | 15.12  | 9.48   | 9.86   | 5.93   | 15.18  | 13.35  | 7.21   | 4.76   | 6.61   |
| $\delta_{\text{Eu}}$               | 0.36   | 0.26   | 0.59   | 0.28   | 0.27   | 0.29   | 0.34   | 0.35   | 0.06   | 0.11   | 0.08   |
| $\delta_{\text{Ce}}$               | 0.99   | 1.11   | 1.06   | 1.37   | 1.43   | 1.11   | 1.01   | 1.05   | 0.98   | 1.07   | 1.07   |
| T (°C)                             | 754    | 764    | 763    | 732    | 736    | 771    | 772    | 736    | 762    | 761    | 776    |

Table S3 (continued)

| Sample No.                         | QD008-1 | QD008-2 | QD009-4 | QD010-2 | QD012-1 | QD013-1 | QD014-4 | QD015-1 | QD016-1 | QD016-2 |
|------------------------------------|---------|---------|---------|---------|---------|---------|---------|---------|---------|---------|
| SiO <sub>2</sub>                   | 66.04   | 66      | 72.21   | 74.1    | 74.15   | 73.49   | 74.1    | 75.51   | 73.59   | 73.38   |
| Al <sub>2</sub> O <sub>3</sub>     | 15.56   | 15.45   | 15.05   | 14.04   | 13.73   | 14.31   | 13.59   | 13.11   | 13.69   | 13.8    |
| Fe <sub>2</sub> O <sub>3</sub>     | 2.02    | 2.15    | 0.86    | 0.94    | 1.01    | 0.91    | 1.34    | 0.87    | 1.28    | 1.18    |
| FeO                                | 0.92    | 0.84    | 0.27    | 0.13    | 0.21    | 0.19    | 0.18    | 0.21    | 0.23    | 0.23    |
| CaO                                | 4.38    | 4.44    | 0.27    | 0.23    | 0.71    | 0.51    | 0.41    | 0.24    | 0.84    | 0.78    |
| MgO                                | 1.97    | 2.1     | 0.073   | 0.1     | 0.26    | 0.14    | 0.21    | 0.083   | 0.36    | 0.31    |
| K <sub>2</sub> O                   | 3.96    | 3.9     | 5.59    | 5.02    | 4.91    | 5.36    | 4.86    | 4.83    | 4.71    | 5.04    |
| Na <sub>2</sub> O                  | 3.98    | 3.93    | 5.27    | 4.86    | 4.13    | 4.65    | 4.56    | 4.73    | 4.24    | 4.18    |
| TiO <sub>2</sub>                   | 0.55    | 0.55    | 0.23    | 0.17    | 0.21    | 0.21    | 0.26    | 0.16    | 0.27    | 0.23    |
| P <sub>2</sub> O <sub>5</sub>      | 0.23    | 0.24    | 0.011   | 0.012   | 0.045   | 0.025   | 0.047   | 0.01    | 0.062   | 0.051   |
| MnO                                | 0.031   | 0.027   | 0.041   | 0.068   | 0.038   | 0.04    | 0.073   | 0.073   | 0.047   | 0.045   |
| LOI                                | 0.26    | 0.3     | 0.096   | 0.33    | 0.58    | 0.15    | 0.36    | 0.17    | 0.67    | 0.75    |
| K <sub>2</sub> O/Na <sub>2</sub> O | 0.99    | 0.99    | 1.06    | 1.03    | 1.19    | 1.15    | 1.07    | 1.02    | 1.11    | 1.21    |
| K <sub>2</sub> O+Na <sub>2</sub> O | 7.94    | 7.83    | 10.86   | 9.88    | 9.04    | 10.01   | 9.42    | 9.56    | 8.95    | 9.22    |
| Mg#                                | 0.66    | 0.66    | 0.14    | 0.17    | 0.34    | 0.23    | 0.24    | 0.16    | 0.36    | 0.34    |
| Li                                 | 8.96    | 8.67    | 5.53    | 15.11   | 6.41    | 11.49   | 3.00    | 5.15    | 7.57    | 7.31    |
| Be                                 | 1.43    | 1.45    | 2.75    | 4.19    | 3.56    | 3.98    | 4.58    | 3.26    | 3.63    | 3.42    |
| Sc                                 | 9.08    | 9.36    | 4.49    | 3.94    | 4.02    | 4.02    | 4.85    | 3.61    | 4.27    | 4.27    |

|    |         |         |         |         |         |         |         |        |         |         |
|----|---------|---------|---------|---------|---------|---------|---------|--------|---------|---------|
| Ti | 3311.92 | 3285.96 | 1360.35 | 1045.59 | 1261.91 | 1249.80 | 1660.65 | 992.97 | 1594.98 | 1480.31 |
| V  | 84.74   | 83.06   | 5.54    | 4.55    | 11.37   | 7.73    | 10.75   | 4.30   | 13.87   | 13.23   |
| Cr | 34.30   | 33.43   | 1.76    | 1.23    | 3.12    | 1.80    | 2.40    | 1.52   | 3.66    | 3.20    |
| Mn | 195.62  | 184.96  | 287.87  | 484.10  | 274.90  | 285.90  | 509.15  | 524.22 | 348.20  | 342.00  |
| Co | 4.24    | 4.41    | 0.58    | 0.17    | 1.05    | 0.63    | 0.79    | 0.19   | 1.48    | 1.38    |
| Ni | 14.91   | 15.40   | 0.62    | 0.27    | 1.05    | 0.53    | 0.66    | 0.40   | 1.93    | 1.40    |
| Cu | 1.47    | 1.42    | 0.57    | 0.41    | 1.99    | 1.22    | 0.88    | 0.63   | 3.24    | 3.40    |
| Zn | 17.86   | 17.70   | 20.44   | 37.60   | 23.81   | 22.91   | 41.57   | 39.24  | 37.43   | 31.96   |
| Ga | 16.27   | 15.95   | 20.80   | 20.35   | 16.27   | 19.21   | 18.96   | 19.59  | 16.75   | 17.02   |
| Rb | 53.69   | 53.08   | 94.84   | 154.47  | 153.77  | 167.97  | 149.14  | 136.66 | 151.21  | 161.05  |
| Sr | 821.63  | 797.10  | 10.78   | 14.43   | 158.82  | 69.01   | 92.42   | 12.69  | 166.60  | 157.32  |
| Y  | 14.12   | 13.67   | 47.32   | 34.36   | 14.09   | 29.69   | 27.13   | 30.08  | 17.81   | 16.44   |
| Zr | 165.12  | 156.16  | 287.06  | 287.65  | 187.51  | 185.75  | 318.74  | 244.19 | 227.15  | 203.39  |
| Nb | 9.55    | 9.85    | 22.04   | 24.72   | 20.29   | 22.09   | 29.33   | 27.16  | 26.14   | 24.15   |
| Cs | 0.50    | 0.50    | 0.46    | 1.11    | 0.78    | 1.05    | 0.77    | 0.72   | 0.79    | 0.79    |
| Ba | 1646.97 | 1468.79 | 45.03   | 71.78   | 637.45  | 395.18  | 503.11  | 59.79  | 626.08  | 653.26  |
| La | 36.81   | 36.36   | 39.36   | 34.15   | 52.25   | 45.17   | 57.21   | 38.67  | 65.37   | 62.62   |
| Ce | 73.95   | 72.87   | 99.10   | 75.84   | 79.96   | 85.19   | 107.15  | 75.45  | 102.26  | 96.30   |
| Pr | 8.01    | 7.83    | 13.52   | 8.85    | 7.07    | 9.72    | 10.75   | 7.82   | 9.27    | 8.59    |
| Nd | 26.96   | 26.03   | 51.80   | 29.21   | 20.37   | 31.90   | 32.93   | 23.85  | 26.14   | 24.19   |

|                                    |        |        |        |        |        |        |        |        |        |        |
|------------------------------------|--------|--------|--------|--------|--------|--------|--------|--------|--------|--------|
| Sm                                 | 4.51   | 4.31   | 12.52  | 6.51   | 3.15   | 6.68   | 5.65   | 4.62   | 4.13   | 3.80   |
| Eu                                 | 1.34   | 1.27   | 0.47   | 0.33   | 0.57   | 0.53   | 0.74   | 0.34   | 0.67   | 0.64   |
| Gd                                 | 3.25   | 3.21   | 10.59  | 5.39   | 2.02   | 5.09   | 4.07   | 3.93   | 2.80   | 2.37   |
| Tb                                 | 0.47   | 0.46   | 1.81   | 0.99   | 0.35   | 0.91   | 0.69   | 0.71   | 0.46   | 0.43   |
| Dy                                 | 2.62   | 2.48   | 10.27  | 6.00   | 2.15   | 5.43   | 4.26   | 4.60   | 2.80   | 2.57   |
| Ho                                 | 0.52   | 0.49   | 1.93   | 1.24   | 0.46   | 1.08   | 0.92   | 1.00   | 0.57   | 0.54   |
| Er                                 | 1.44   | 1.41   | 5.00   | 3.58   | 1.44   | 3.07   | 2.84   | 3.05   | 1.79   | 1.67   |
| Tm                                 | 0.21   | 0.21   | 0.66   | 0.52   | 0.23   | 0.44   | 0.44   | 0.48   | 0.28   | 0.27   |
| Yb                                 | 1.43   | 1.39   | 3.85   | 3.42   | 1.71   | 2.83   | 3.14   | 3.17   | 2.07   | 1.93   |
| Lu                                 | 0.22   | 0.22   | 0.49   | 0.50   | 0.27   | 0.40   | 0.49   | 0.46   | 0.34   | 0.31   |
| Hf                                 | 4.35   | 4.20   | 7.60   | 8.63   | 5.71   | 5.36   | 8.84   | 7.21   | 6.82   | 6.09   |
| Ta                                 | 0.76   | 0.81   | 1.41   | 1.46   | 1.31   | 1.46   | 1.77   | 1.64   | 1.66   | 1.53   |
| Pb                                 | 10.24  | 10.12  | 13.30  | 15.68  | 20.85  | 21.22  | 22.79  | 16.79  | 22.82  | 22.31  |
| Th                                 | 12.69  | 13.19  | 10.17  | 11.72  | 15.88  | 12.81  | 14.77  | 12.60  | 18.37  | 18.61  |
| U                                  | 1.71   | 1.71   | 0.91   | 1.18   | 1.68   | 1.55   | 1.79   | 1.02   | 1.99   | 1.98   |
| $\Sigma_{\text{REE}}$              | 161.72 | 158.54 | 251.37 | 176.53 | 172.01 | 198.44 | 231.27 | 168.15 | 218.95 | 206.25 |
| $L_{\text{REE}}/H_{\text{REE}}$    | 14.94  | 15.08  | 6.26   | 7.16   | 18.92  | 9.31   | 12.73  | 8.66   | 18.70  | 19.41  |
| $(\text{La}/\text{Yb})_{\text{N}}$ | 18.52  | 18.72  | 7.33   | 7.17   | 21.90  | 11.43  | 13.06  | 8.75   | 22.64  | 23.22  |
| $\delta_{\text{Eu}}$               | 1.07   | 1.04   | 0.13   | 0.17   | 0.68   | 0.28   | 0.47   | 0.25   | 0.60   | 0.65   |
| $\delta_{\text{Ce}}$               | 1.06   | 1.06   | 1.05   | 1.07   | 1.02   | 1.00   | 1.06   | 1.06   | 1.02   | 1.02   |

|                                   |     |        |     |     |     |     |     |     |        |     |
|-----------------------------------|-----|--------|-----|-----|-----|-----|-----|-----|--------|-----|
| T (°C)                            | 680 | 675    | 787 | 798 | 755 | 746 | 810 | 777 | 772    | 759 |
| $^{87}\text{Sr}/^{86}\text{Sr}$   |     | 0.7088 |     |     |     |     |     |     | 0.7124 |     |
| $^{143}\text{Nd}/^{144}\text{Nd}$ |     | 0.5117 |     |     |     |     |     |     | 0.5117 |     |
| I <sub>Sr</sub>                   |     | 0.7085 |     |     |     |     |     |     | 0.7079 |     |
| ε <sub>Nd</sub> (t)               |     | -16.71 |     |     |     |     |     |     | -17.71 |     |
| T <sub>DM1</sub> (Ma)             |     | 1931   |     |     |     |     |     |     | 1928   |     |
| T <sub>DM2</sub> (Ma)             |     | 2271   |     |     |     |     |     |     | 2353   |     |
